# Supplementary figures and images for: Soft glassy rheology of single cells with pathogenic protein aggregates
Source: Royal Society of Chemistry journal article supplement (doi:10.1039/d4sm00595c), 2024-01-01

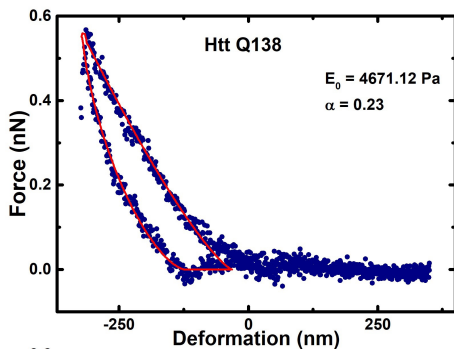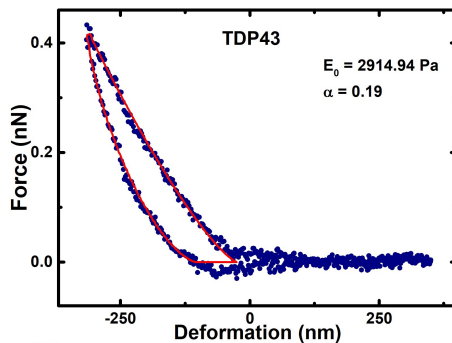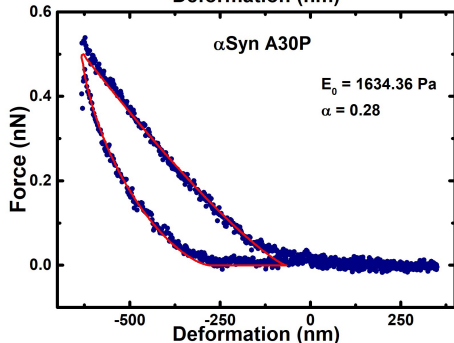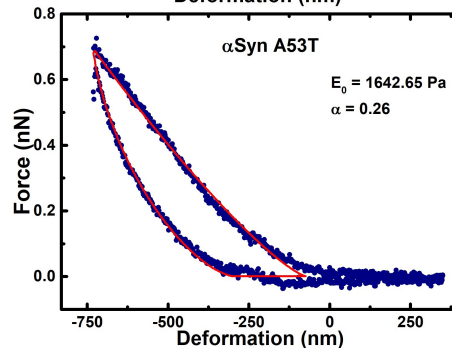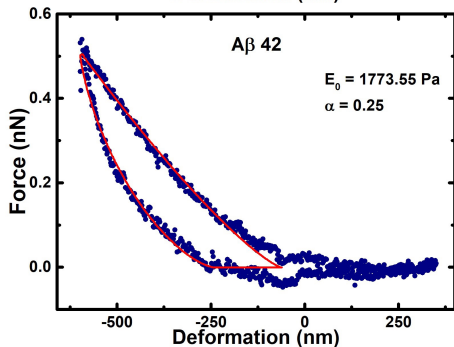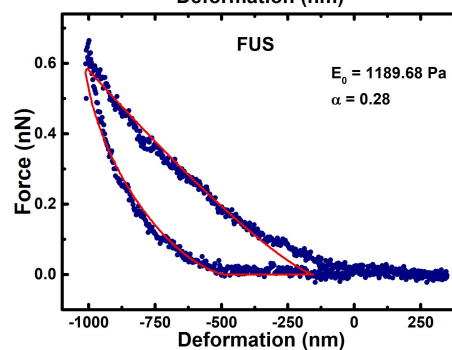

Supplement: d4sm00595c1.pdf [file d4sm00595c1.pdf]

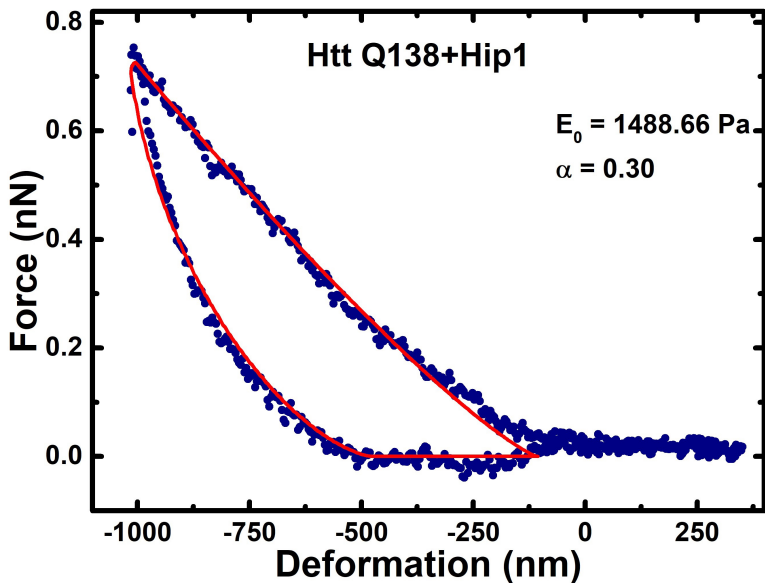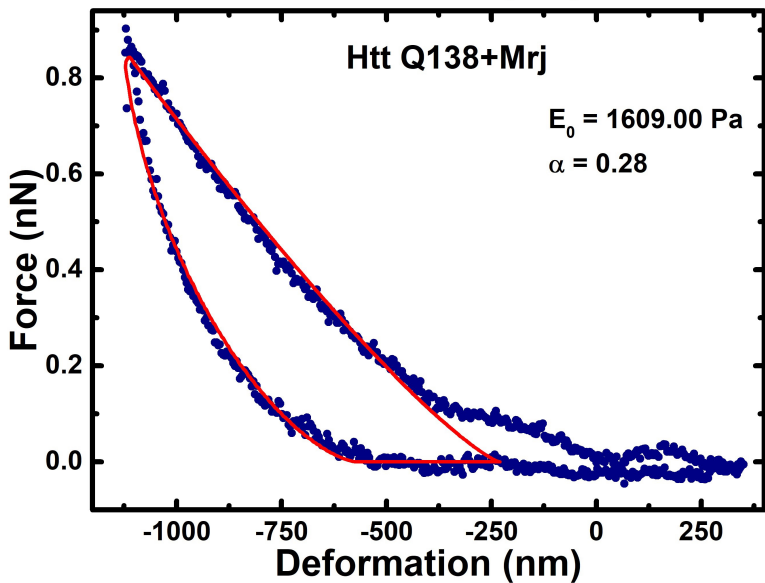

Supplement: d4sm00595c2.pdf [file d4sm00595c2.pdf]
